# Supplementary material for: Prediction of Complications and Prognostication in Perioperative Medicine: A Systematic Review and PROBAST Assessment of Machine Learning Tools
Source: PubMed Central journal article supplement (PMC11146190; doi:10.1097/aln.0000000000004764), 2023-11-09
Supplement: aln-140-85-s001.pdf [file aln-140-85-s001.pdf]

**Supplementary Table 1** Summary of data extracted for each paper included in the systematic review with a focus on features, outcomes and limitations stated.

Summary of data extracted for each paper included in the systematic review with a focus on PROBAST topic area, type of study, features, development stage according to authors, machine learning model, metrics and benchmarks. Legend: [\*] best performance model in the study, ANN: Artificial Neural network; BB: Balanced Bagging; BERT-DNN: Deep Neural Network model with bidirectional encoder representations from transformers; BRF: Balanced Random Forest; DBN: Deep Belief Network; EEG: Electro-Encephalogram; GAM-NN: Generalized Additive Models with Neural Networks; GBM: Gradient Boosting Machine; GLM: Generalized linear model; GNB: Gaussian Naïve Bayes; ICU: Intensive Care Unit; LDA: Linear Discriminant Analysis; LDC: Linear Discriminant Classifier; Light GBM: Light Gradient Boosting Machine; LinR; Linear Regression; LR: Logistical Regression; MARS: Multivariate Adaptive Regression Splines; MLP: Multilayer Perceptron; ML: Machine Learning; MPCNN-CNN: Multipath Convolutional Neural Network model, Convolutional Neural Network method of handling time-series; MPCNN-LSTM: Multipath Convolutional Neural Network model, long short-term memory method of handling time-series; NB: Naïve Bayes; NN: Neural Network; OLT: Orthotopic liver transplantation; RF: Random Forest; PACU: Post Anaesthesia Care Unit; PTS: patients; RR: Regularized Regression; SVM: Support Vector Machine; XGBoost: eXtreme Gradient Boosting.

SGB: Stochastic Gradient Boosting

| Outcome                                     | Author, year, country<br>- Study design, N° of<br>pts                                               | Topic Area                                                                     | Development<br>(1), Validation<br>(2), both (3) -<br>Diagnostic (D)<br>or Prognostic<br>(P) | Features                                                                                                                                                    | Machine Learning &<br>Performance                                                                                                                                                                                                                                                                                                                                                              | Validation                                                                              | Development<br>stage | Benchmark                              |
|---------------------------------------------|-----------------------------------------------------------------------------------------------------|--------------------------------------------------------------------------------|---------------------------------------------------------------------------------------------|-------------------------------------------------------------------------------------------------------------------------------------------------------------|------------------------------------------------------------------------------------------------------------------------------------------------------------------------------------------------------------------------------------------------------------------------------------------------------------------------------------------------------------------------------------------------|-----------------------------------------------------------------------------------------|----------------------|----------------------------------------|
| Cardiac surgery<br>- Mortality              | Castela Forte J., 2021,<br>Netherland <sup>110</sup> -<br>Retrospective, single<br>centre, 8241 pts | 5-years mortality post cardiac<br>valve and CABG operations                    | 1 - P                                                                                       | Demographics, intra and post-<br>operative vitals and laboratory<br>values                                                                                  | Super Learner (SL) Algorithm[*],<br>ensemble using XGB, BART<br>(Bayesian additive regression<br>trees), LR, SVM, extremely<br>random trees - SL on all data:<br>AUC 0.81, sensitivity specificity,<br>Estimated calibration index (ECI)<br>0.291, sensitivity = 0.177,<br>specificity = 0.986, cut-off<br>defined by the maximum Youden<br>index: sensitivity = 0.701,<br>specificity = 0.699 | Internal validation k-fold-<br>cross-validated                                          | 2                    | NA                                     |
| Cardiac surgery<br>- Mortality              | Fernandes M. P. B.,<br>2021, USA <sup>49</sup> -<br>Retrospective, single<br>centre, 5015 pts       | ML to predict 30 days mortality<br>after cardiac surgery                       | 1 - P                                                                                       | Demographics, Echocardiography,<br>renal failure, category of surgery,<br>Cardio-pulmonary bypass (CPB),<br>duration cross clamp-time,<br>vasopressors dose | LR,RF[*], NN, SVM, XGBoost[*] -<br>Best results for 3 different<br>phases. Outside CPB<br>(cardiopulmonary bypass)<br>phase: XGBoost AUC of 0.87,<br>sensitivity 0.75, specificity 0.85,<br>PPV 0.10 - CPB phase: RF AUC<br>of 0.86, Total surgery phase:<br>XGBoost AUC of 0.85                                                                                                               | Internal validation with<br>train-test split, 25% of the<br>database used for testing   | 2                    | NA                                     |
| Cardiac surgery -<br>intraop -<br>Morbidity | Li X. F., 2021, China <sup>50</sup><br>- Retrospective, single<br>centre, 3030 pts                  | Prediction of hypotension after<br>anaesthesia induction in<br>cardiac surgery | 1 - P                                                                                       | Demographics, comorbidities, ASA<br>score, preoperative drugs, type of<br>surgery, EUROscore 1, ECHO,<br>intraoperative values and drugs                    | RF - RF: AUC of 0.84, specificity<br>0.85, sensitivity 0.78                                                                                                                                                                                                                                                                                                                                    | Internal validation with<br>Hold-out method, 30% of<br>the database used for<br>testing | 2                    | NA                                     |
| Cardiac surgery -<br>Morbidity              | Gao Y., 2022, China <sup>64</sup><br>- Retrospective, single<br>centre, 1045 pts                    | Perioperative major bleeding<br>post cardiac surgery                           | 1 - P                                                                                       | Demographics, type of surgery,<br>clinical and laboratory parameters,<br>antiplatelets use in patients<br>presenting with CAD                               | LR, SVM, GBT, XGB, RF,<br>Conditional inference random<br>forest (CIRF), boosted<br>classification trees, Naive bayes<br>(NB), classification and<br>regression tree CART [*] -<br>CART: AUC=0.831                                                                                                                                                                                             | Internal validation, split<br>70/30, five-fold cross<br>validation                      | 2                    | TRUST score, WILL-<br>BLEED risk score |
| Cardiac surgery -<br>Morbidity              | Jiang H., 2021,<br>China <sup>56</sup> -<br>Retrospective, single<br>centre, 1488 pts               | Complication after Mitral valve<br>surgery                                     | 1 - P                                                                                       | Demographic characteristics,<br>concomitant disease, preoperative<br>laboratory indicators, operation type,<br>intraoperative information,                  | XGB[*], SVM, LR, RF, GBM,<br>KNN, NB, AdaBoost - XGB: AUC<br>0.895, accuracy 0.81, sensitivity<br>0.89, specificity 0.81, F1-score<br>0.26                                                                                                                                                                                                                                                     | Internal validation, ten-fold<br>cross validation                                       | 2                    | NA                                     |

|                               |                                                                                              |                                                                                                                                               |       |                                                                                                                                                                                                    |                                                                                                                                                                                                                                                                          |                                                                                |   |                          |
|-------------------------------|----------------------------------------------------------------------------------------------|-----------------------------------------------------------------------------------------------------------------------------------------------|-------|----------------------------------------------------------------------------------------------------------------------------------------------------------------------------------------------------|--------------------------------------------------------------------------------------------------------------------------------------------------------------------------------------------------------------------------------------------------------------------------|--------------------------------------------------------------------------------|---|--------------------------|
| Cardiac surgery - Morbidity   | Lee H. C., 2018, South Korea <sup>85</sup> - Retrospective, single centre, 2010 pts          | Prediction of Acute Kidney Injury after Cardiac Surgery                                                                                       | 1 - P | Demographics, comorbidities, preoperative medications and blood values, type of surgery, anaesthesia duration, intraoperative transfusion, intraoperative values, colloid use, type of anaesthesia | DT, RF, GBM[*], SVM, NN, DBN - GBM: AUC 0.78                                                                                                                                                                                                                             | Internal validation with Hold-out method, 50% of the database used for testing | 2 | AKICS score, LR          |
| Cardiac surgery - Morbidity   | Li T., 2022, China <sup>88</sup> - Retrospective, single centre, 102 pts                     | Acute Kidney Injury stage 3 after heart transplantation                                                                                       | 1 - P | Demographics, past medical history, type of surgery, type of anaesthesia, echography values                                                                                                        | LR with L2 regularization - LR: AUC 0.821, sensitivity 0.80, specificity 0.86                                                                                                                                                                                            | Internal validation, 10 cross fold validation                                  | 2 | Cleveland clinical model |
| Cardiac surgery - Morbidity   | Petrosyan Y., 2022, Canada <sup>89</sup> - Retrospective, single centre, 6522 pts            | Prediction of Acute Kidney Injury post cardiac surgery                                                                                        | 1 - P | demographics, past medical history, NYHA classification, laboratory data                                                                                                                           | ensemble model using RF followed by LR - Ensemble: AUC 0.75, Specificity 0.94, Sensitivity 0.67                                                                                                                                                                          | Internal validation                                                            | 2 | NA                       |
| Cardiac surgery - Morbidity   | Shi S., 2021, China <sup>90</sup> - Retrospective, single centre, 672 pts                    | Prediction of postoperative liver dysfunction after aortic arch surgery                                                                       | 1 - P | Demographics, past medical history, type of surgery, echocardiography, intraoperative fluid and blood use, postoperative liver function                                                            | LR, SVM, RF, NB[*] - NB: AUC 0.88                                                                                                                                                                                                                                        | Internal validation, 70/30 random split                                        | 2 | NA                       |
| Cardiac surgery - Morbidity   | Tschoellitsch T., 2022, Austria <sup>90</sup> - Retrospective, single centre, 3782 pts       | Prediction of massive perioperative allogeneic blood transfusion in cardiac surgery                                                           | 1 - P | Hospital admission, past medical history,                                                                                                                                                          | RF, NN, GBM, ADA (adaptive boosting), LR - RF: AUC 0.81, F1-score 0.15, NPV 0.987, PPV 0.110                                                                                                                                                                             | Internal validation, five-fold cross validation                                | 2 | NA                       |
| Cardiac surgery - Mortality   | Castela Forte J., 2022, Netherland <sup>111</sup> - Retrospective, single centre, 9415 pts   | Comparison of perioperative feature use to predict overall mortality rates at 30 days, 1 year, and 5 years in cardiac surgery                 | 2 - P | Demographics, intra and post-operative vitals and laboratory values                                                                                                                                | LSTM (long short term memory) NN [*], postoperative data analysis with XGB - LSTM (30 d mortality with full perioperative): AUC 0.81, Sensitivity 0.59, Specificity 0.82 - LSTM (1 year mortality with full perioperative): AUC 0.82, Sensitivity 0.54, Specificity 0.88 | Internal validation, 10-fold cross-validation                                  | 2 | NA                       |
| Cesarean delivery - Morbidity | Ren W., 2022, China <sup>95</sup> - Retrospective, single centre, 600 pts                    | Predicting the amount of blood transfusion during caesarean section and analysing the risk factors of hypothermia during anaesthesia recovery | 1 - P | Demographics, diagnosis, admission time, type of anaesthesia                                                                                                                                       | LR, XGBoost, ANN[*] - ANN: AUC 0.957, F1-score 0.951, recall 0.955                                                                                                                                                                                                       | Internal validation with Hold-out method, 25% of the database used for testing | 2 | NA                       |
| Emergency surgery - Morbidity | Xue Q., 2021, China <sup>65</sup> - Retrospective, single centre, 926 pts, emergency surgery | Predict pulmonary complications after emergency gastrointestinal surgery                                                                      | 1 - P | Laboratory values, past medical history, demographics, location of lesion                                                                                                                          | LR[*], XGB, Decision tree, gradient boosting, - LR: AUC 0.836                                                                                                                                                                                                            | Internal validation, Five-fold cross-validation                                | 2 | NA                       |

|                                             |                                                                                                                                                                                                                     |                                                                                                                                                   |       |                                                                                                                                                                                                                                             |                                                                                                                               |                                                                                |   |                          |
|---------------------------------------------|---------------------------------------------------------------------------------------------------------------------------------------------------------------------------------------------------------------------|---------------------------------------------------------------------------------------------------------------------------------------------------|-------|---------------------------------------------------------------------------------------------------------------------------------------------------------------------------------------------------------------------------------------------|-------------------------------------------------------------------------------------------------------------------------------|--------------------------------------------------------------------------------|---|--------------------------|
| Emergency surgery - Morbidity and Mortality | Bertsimas D., 2018, USA <sup>63</sup> - Retrospective, multiple centres from American College of Surgeons (ACS) National Surgical Quality Improvement Program (ACS-NSQIP) database, 382960 pats, emergency patients | Design an interactive, nonlinear risk calculator for Emergency Surgery (ES) to predict 30 days mortality and morbidity                            | 1 - P | From ACS-NSQIP database, patient demographics, comorbidities, laboratory variables, and wound characteristics                                                                                                                               | Optimal classification trees (OCT) - Mortality AUC 0.92                                                                       | Internal validation with Hold-out method                                       | 2 | LR                       |
| Emergency surgery - Morbidity and Mortality | El Hechi M.W, 2021, USA <sup>69</sup> - Retrospective, multiple centres, 59955 pts, emergency patients                                                                                                              | Validation of Predictive Optimal Trees in Emergency Surgery Risk (POTTER) tool to predict 30 days mortality and morbidity after emergency surgery | 2 - P | From ACS-NSQIP database, patient demographics, comorbidities, laboratory variables                                                                                                                                                          | Optimal classification trees (OCT) (see Bertimas, D, 2018) - Mortality AUC 0.93                                               | External validation                                                            | 3 | NA                       |
| Emergency surgery - Mortality               | Gao J., 2021, USA <sup>122</sup> - Retrospective, multicentre using the national surgical outcome database (National Surgical Quality Improvement Program - NSQIP), 177872 pts, emergency surgery                   | Mortality 30 days following Emergency General Surgery                                                                                             | 2 - P | From ACS-NSQIP database, demographics, past medical history, steroids use, type of surgery                                                                                                                                                  | GBM, NN (ANN), ensemble voting classifier (VC)[*] - VC: AUC 0.956, sensitivity 0.948, specificity 0.855, PPV 0.214, NPV 0.997 | Internal validation, 10-fold stratified cross-validation, split 90/10          | 2 | NA                       |
| Emergency surgery - Procedural              | Misic V., 2020, USA <sup>42</sup> - Retrospective, multi centre, 34532 pts, emergency surgery                                                                                                                       | 30 days readmission via the emergency department                                                                                                  | 3 - P | Demographics, past medical history, ASA score, surgical blood loss, tracheostomy, mechanical ventilation, readmission to hospital                                                                                                           | LR, GBDT[*], RF - GBDT (general + labs + meds + teams + cpt): AUC=0.867, Brier score=0.045                                    | External validation with external database and temporal validation             | 3 | HOSPITAL and LACE scores |
| Liver transplant - Morbidity                | Chen C, 2023, China <sup>91</sup> - Retrospective, single centre, 786 pts                                                                                                                                           | Postoperative sepsis post liver transplant                                                                                                        | 3 - P | Meld Score, child pugh score                                                                                                                                                                                                                | LR, SVM, GNB, RF[*]. GBM - RF, AUC 0.731, accuracy 0.71, sensitivity 0.62, specificity 0.76                                   | External validation with an independent dataset from same hospital             | 3 | NA                       |
| Liver transplant - Morbidity                | Chen C., 2021, China <sup>37</sup> - Retrospective, single centre, 591 pts                                                                                                                                          | Predict pneumonia after Orthotopic liver transplantation                                                                                          | 1 - P | Demographics, Preoperative comorbidities, aetiology of liver failure, perioperative laboratory values, preoperative complications, microorganism observation, intraoperative medications, fluids and transfusion, postoperative medication. | XGBoost[*], LR, SVM, RF, MLP, GBM - XGBoost: AUC 0.79, sensitivity 0.52, specificity 0.77                                     | Internal validation with hold-out method, 30% of the database used for testing | 2 | NA                       |
| Liver transplant - Morbidity                | Kamaleswaran R., 2021, USA <sup>92</sup> - Retrospective, single centre, 5748 pts                                                                                                                                   | Early sepsis after liver transplant                                                                                                               | 1 - P | 3-h observational window continuous for six physiological data streams [heart rate, respiratory rate, oxygen saturation, systolic blood pressure (SBP), diastolic blood pressure (DBP), and mean femoral artery blood pressure (MAP)]       | XGB[*], LR, SVM, RF, - XGB: AUC 0.97, Precision-recall 0.97                                                                   | Internal validation, 5-fold cross validation                                   | 2 | NA                       |

|                                                          |                                                                                                                                                                 |                                                                                                              |       |                                                                                                                                                                                                                                                               |                                                                                                                                                                                                                      |                                                                                                                                                   |     |                      |
|----------------------------------------------------------|-----------------------------------------------------------------------------------------------------------------------------------------------------------------|--------------------------------------------------------------------------------------------------------------|-------|---------------------------------------------------------------------------------------------------------------------------------------------------------------------------------------------------------------------------------------------------------------|----------------------------------------------------------------------------------------------------------------------------------------------------------------------------------------------------------------------|---------------------------------------------------------------------------------------------------------------------------------------------------|-----|----------------------|
| Liver transplant - Morbidity                             | Lee H. C., 2018, South Korea <sup>86</sup> - Retrospective, single centre, 1211 pts                                                                             | Prediction of Acute Kidney Injury after liver transplant                                                     | 1 - P | Demographics, comorbidities, preoperative medications, cause of liver transplant, preoperative status (Child-Turcotte-Pugh score), preoperative blood measurements, surgery type and anaesthesia details, intraoperative transfusions, drugs and measurements | DT, RF, GBM[*], SVM, NB, MLP, DBN, LR - GBM: AUC 0.90, accuracy 0.84                                                                                                                                                 | Internal validation with Hold-out method, 30% of the database used for testing                                                                    | 2   | LR                   |
| Liver transplant - Morbidity                             | Zhang Y., 2021, China <sup>28</sup> - Retrospective, single centre, 780 pts                                                                                     | Prediction of acute kidney injury (AKI) after liver transplantation (LT)                                     | 2 - P | Demographics, comorbidities, aetiology of liver and complications, preoperative values, intraoperative incidents, medications, fluid infusion and blood transfusion, postoperative medications                                                                | LR, SVM, RF, GBM[*], AdaBoost - GBM: AUC 0.76, F1-score 0.73                                                                                                                                                         | External validation with independent Database involving 195 cases. Internal validation with hold-out method, 30% of the database used for testing | 3   | AKI prediction score |
| Major elective non-Cardiac surgery - Morbidity           | Jeong Y. S., 2021, South Korea <sup>55</sup> - Retrospective, single centre, 3220 pts                                                                           | Predict postoperative complication and major adverse cardiac events in patients with End Stage Renal Disease | 1 - P | Demographics, perioperative blood values, type of anaesthesia, type of surgery                                                                                                                                                                                | SVM, DT, RF, GNB, ANN, LR[*], XGBoost - RF with demographic, electrolyte, anaesthesia and operation features: F1 Score of 0.796. AUC not reported, NLP used for feature extraction.                                  | Internal validation with hold-out method, 53 pts used for testing                                                                                 | 2   | NA                   |
| Major elective non-Cardiac surgery - Intraop - Morbidity | Adhikari L., 2019, USA <sup>87</sup> - Retrospective, single centre, 2911 pts                                                                                   | Prediction of acute kidney injury with intraoperative data                                                   | 1 - P | 69 preoperative variables, intraoperative time-series features                                                                                                                                                                                                | IDEA (Intraoperative Data Embedded Analytics) algorithm based on generalized additive model (GAM) with logistic link function and RF - For 7 days AKI: AUC 0.86, accuracy 0.80, sensitivity 0.81, PPV 0.74, NPV 0.85 | Internal validation with randomly split into 70% for training and 30% for validation                                                              | 2   | NA                   |
| Major elective non-Cardiac surgery - Intraop - Morbidity | Cartailler J., 2019, France <sup>100</sup> - Prospective, single centre, 79 pts                                                                                 | Prediction of Iso-electric suppressions from EEG during anaesthesia using a Machine Learning Model           | 1 - P | Demographics, intraoperativecontinuous EEG features, perioperative vitals (MAP)                                                                                                                                                                               | Univariate LR and multivariate LR[*] - Univariate LR: AUC of 0.90, multivariate LR: AUC of 0.93                                                                                                                      | Method of validation not stated                                                                                                                   | 4   | NA                   |
| Major elective non-Cardiac surgery - intraop - Morbidity | Hatib F., 2018, USA <sup>27</sup> - Retrospective, single centre + Prospective, cohort, single centre, 1334 pts retrospective study + 204 pts prospective study | Prediction of intraoperative hypotension                                                                     | 2 - P | Arterial waveform features                                                                                                                                                                                                                                    | LR with patented preprocessing pipeline - NA                                                                                                                                                                         | Internal validation                                                                                                                               | 2+4 | NA                   |
| Major elective non-Cardiac surgery - intraop - Morbidity | Jacquet-Lagrez M., 2019, France <sup>101</sup> - Retrospective, multicentre, 83 Pts                                                                             | Build a predictive model of intraoperative hypotension using linear extrapolation (LepMAP)                   | 1 - P | 10 minutes segments of intraoperative arterial pressure analysis                                                                                                                                                                                              | Linear extrapolation (LepMAP) - 1 minute before occurrence - LepMAP: AUC of 0.97, 2 minute before occurrence - LepMAP: AUC of 0.81, 5 minute before occurrence - LepMAP: AUC of 0.69                                 | Internal validation, 2000 repetitions of bootstrapping                                                                                            | 2   | NA                   |

|                                                          |                                                                                                                            |                                                                                                                                                           |       |                                                                                                                                                                                                                                                                                                                      |                                                                                                                                                                            |                                                                                 |   |                                                  |
|----------------------------------------------------------|----------------------------------------------------------------------------------------------------------------------------|-----------------------------------------------------------------------------------------------------------------------------------------------------------|-------|----------------------------------------------------------------------------------------------------------------------------------------------------------------------------------------------------------------------------------------------------------------------------------------------------------------------|----------------------------------------------------------------------------------------------------------------------------------------------------------------------------|---------------------------------------------------------------------------------|---|--------------------------------------------------|
| Major elective non-Cardiac surgery - intraop - Morbidity | Kang A. R., 2020, South Korea <sup>102</sup> - Retrospective, single centre, 222 Pts                                       | Predict the risk of intraoperative hypotension post anaesthesia induction                                                                                 | 1 - P | Demographics, ASA score, comorbidities, intraoperative vitals, Standardized anaesthesia induction (TCI with propofol and remifentanyl), intraoperative vital signs, mechanical ventilation, pharmacological data, vasoactive drug administration in laparoscopic cholecystectomy                                     | NB, LR, RF[*], ANN - RF: AUC of 0.8423, precision: 0.81, accuracy: 0.79                                                                                                    | internal validation with K-fold cross-validation, number of folds not stated    | 2 | NA                                               |
| Major elective non-Cardiac surgery - Intraop - Morbidity | Kendale S., 2018, USA <sup>106</sup> - Retrospective, single centre, 13323 pts                                             | Prediction of postinduction hypotension in patient requiring general anaesthesia                                                                          | 1 - P | Demographic, ASA score, comorbidities, Preoperative medications, type of surgery, intraoperative medications, ventilatory settings, intraoperative vitals                                                                                                                                                            | LR, SVM, NB, KNN, LDA, RF, NN, GBM[*] - GBM: AUC 0.76, sensitivity 0.64, Specifity 0.75                                                                                    | Internal validation with Hold-out method, 30% of the database used for testing  | 2 | NA                                               |
| Major elective non-Cardiac surgery - Intraop - Morbidity | Lee S., 2021, South Korea <sup>105</sup> - Retrospective, single centre, 3301 pts                                          | Real-time predictions 5, 10, and 15 min before a hypotensive event                                                                                        | 1 - P | Continuous data from invasive and non invasive arterial pressure waveform and electrocardiography, photoplethysmography, capnography                                                                                                                                                                                 | NN Binary classifier model[*], LR model - 5 min prediction arterial pressure only model NN: AUROC 0.931, sensitivity 0.85, specificity 0.85                                | Method of validation not stated                                                 | 2 | LR                                               |
| Major elective non-Cardiac surgery - intraop - Morbidity | Lundberg S. M., 2018, USA <sup>108</sup> - Retrospective, single centre, 48069 pts                                         | Predict hypoxemia during surgery using a ML based model (Prescience)                                                                                      | 1 - P | Demographics, surgery type, preoperative medication, time-series intraoperative vitals (saturation)                                                                                                                                                                                                                  | GBM - AUC of 0.92                                                                                                                                                          | Internal validation with Hold-out method, 963674 samples used for model testing | 2 | Anaesthesiologist's ability to predict hypoxemia |
| Major elective non-Cardiac surgery - Intraop - Morbidity | Maheshwari K., 2020, USA <sup>104</sup> - Prospective, single centre, 320 pts                                              | Predict hypotension with non-invasive arterial pressure waveforms                                                                                         | 1 - P | Demographics, past medical history, Intraoperative waveform                                                                                                                                                                                                                                                          | Ad hoc model described in Hatib et al - HPI: AUC of 0.93, sensitivity 0.86, specificity 0.86                                                                               | Method of validation not stated                                                 | 4 | NA                                               |
| Major elective non-Cardiac surgery - intraop - Morbidity | Schenk J., 2021, Netherlands <sup>103</sup> - Sub-study of prospective trial (Hypotension prediction trial - HYPE), 60 pts | Assessment of the use of intraoperative Hypotension Predictor Index (HPI) guided haemodynamic care to prediction development of postoperative hypotension | 1 - P | Demographics, comorbidities, pre-procedure medication, type of surgery, intraoperative medication and fluid balance, duration of anaesthesia, postoperative monitoring, type of anaesthesia, postoperative fluid balance, postoperative mechanical ventilation and its duration, postoperative complications         | Ad hoc model described in Hatib et al - Intraoperative HPI-guided haemodynamic care did reduce IOH, but did not lower the Time-weight average of POH.                      | Method of validation not stated                                                 | 4 | NA                                               |
| Major elective non-Cardiac surgery - intraop - Morbidity | Solomon S. C., 2020, USA <sup>107</sup> - Retrospective, single centre, 62182 pts                                          | Predicting the occurrence of intraoperative bradycardia                                                                                                   | 1 - P | Demographics, ASA score, medical history, preoperative vital signs, medication history, operating room location, procedure type, anaesthesia type, intraoperative vital sign data, all administered bolus and infused medications, fluid administration, ventilator data including respiratory rate and tidal volume | GBM - Predicted at 3 time points, induction of anaesthesia - AUC of 0.81, start of the procedure - AUC of 0.87, 30 minutes after the start of the procedure - AUC of 0.89. | Internal validation with 10-fold cross-validation                               | 2 | LR                                               |

|                                                          |                                                                                                 |                                                                                                                                                                   |       |                                                                                                                           |                                                                                                                                                                                  |                                                                                           |   |                                                                                                |
|----------------------------------------------------------|-------------------------------------------------------------------------------------------------|-------------------------------------------------------------------------------------------------------------------------------------------------------------------|-------|---------------------------------------------------------------------------------------------------------------------------|----------------------------------------------------------------------------------------------------------------------------------------------------------------------------------|-------------------------------------------------------------------------------------------|---|------------------------------------------------------------------------------------------------|
| Major elective non-Cardiac surgery - intraop - Morbidity | Wijnberge M., 2020, Netherlands <sup>35</sup> - Prospective, single centre, 68 pts              | Investigating the use of a early warning system for intraoperative hypotension.                                                                                   | 1 - P | Demographics, ASA score, WHO classification, type of surgery, surgical approach, intraoperative values                    | Ad hoc model described in Hatib et al - ML model application significantly reduced the time-weighted average of hypotension during surgery                                       | Method of validation not stated                                                           | 5 | Comparison with standard care treatment                                                        |
| Major elective non-Cardiac surgery - Morbidity           | Awadalla S. S., 2022, USA <sup>67</sup> - Retrospective, cohort, single centre, 2106 pts        | Clinically meaningful pain (>3 on a 0–10 scale) at 30-days and 1-year after surgery were the primary and secondary outcomes                                       | 1 - P | Patient response to surveys, demography, ASA, Charles Score, surgical category, anaesthesia Type                          | k-means clustering, LR - Clusterization was significant on meaningful postsurgical pain at 30 days (p<0.001), but not at 1-year after surgery (p=0.79). Cluster IV: AUC of 0.087 | Hosmer-Lemeshow goodness-of-fit test, internal validation with cross-validation performed | 2 | NA                                                                                             |
| Major elective non-Cardiac surgery - Morbidity           | Bishara A., 2021, USA <sup>61</sup> - Retrospective, single centre, 29004 pts                   | OPAL - Post-op Acute Kidney Injury development                                                                                                                    | 1 - P | Demographics, ASA score, Type of surgery                                                                                  | k-means clustering, GBM [*], LR - GBM: AUC of 0.85, Sensibility 0.9, Specificity 0.8                                                                                             | Internal hold-out method, 20% of the database used for testing                            | 2 | LR                                                                                             |
| Major elective non-Cardiac surgery - Morbidity           | Bishara A., 2022, USA <sup>76</sup> - Retrospective, single centre, 24885 pts                   | Postoperative delirium detection                                                                                                                                  | 1 - P | Demographics, ASA score, in total 115 predictor variables, type of surgery, emergency surgery                             | LR based on features selected by clinicians, LR based on machine learning feature selection, XGBoost [*], NN - NN: AUC 0.84, sensitivity 0.72, specificity 0.77                  | Internal 10-fold cross-validation                                                         | 2 | Two LR models ('ML hybrid' and 'clinician guided'), delirium risk stratification tool (AWOL-S) |
| Major elective non-Cardiac surgery - Morbidity           | Bolourani S., 2020, USA <sup>63</sup> - Retrospective, multiple centres, 4062                   | Respiratory failure post pulmonary lobectomy                                                                                                                      | 1 - P | From National Inpatient Sample (NIS), patient demographics, past medical history, type of surgery, intraoperative events, | RF with and without SMOTE - RF Sensitivity 0.75, Specificity 0.99, AUC 0.83 - RF with SMOTE Sensitivity 0.83 Specificity 0.94, AUC 0.90                                          | Internal validation                                                                       | 2 | NA                                                                                             |
| Major elective non-Cardiac surgery - Morbidity           | Brennan M., 2019, USA <sup>33</sup> - Prospective, non-randomized pilot, single centre, 150 pts | Compare the usability and accuracy of preoperative risk assessment between physicians and MySurgeryRisk                                                           | 1 - P | 286 preoperative features, demographics, socio-economics, administrative, clinical, pharmacy, and laboratory variables    | MySurgeryRisk model (Zeng, F) - AUC range 0.73 and 0.85                                                                                                                          | Method of validation not stated                                                           | 4 | Physicians' Initial Risk Assessment                                                            |
| Major elective non-Cardiac surgery - Morbidity           | Chelazzi C., 2021, Italy <sup>64</sup> - Retrospective, single centre, 560 pts                  | Implementing an automated surgical risk calculator based on Artificial Neural Network technology (SUMPOT) to identify pts at risk for postoperative complications | 1 - P | Demographics, ASA score, type of surgery, surgical factors, Clavie-Dindo Score                                            | ANN using Single Layer Feedforward Network (SLFN)[*], BDT - SLFN: AUC of 0.89, sensitivity 0.89, specificity 0.90                                                                | Internal cross-validation                                                                 | 2 | Binary Decision Tree (AUC 0.58)                                                                |
| Major elective non-Cardiac surgery - Morbidity           | Du Y., 2022, China <sup>64</sup> - Retrospective, single centre, 130 pts                        | Infection risk prediction in postoperative patients with non-mechanical ventilation and intravenous neurotargeted drugs                                           | 1 - P | Demographics, opioids use, laboratory data                                                                                | RF, SVM-RFE (Support Vector Machine-Recursive Feature Elimination)[*], LR, NN - SVM: AUC 0.830                                                                                   | Internal validation                                                                       | 2 | LR                                                                                             |

|                                                |                                                                                                                                                                                            |                                                                                                                    |       |                                                                                                                                                                                                                                      |                                                                                                   |                                                                                             |   |                                              |
|------------------------------------------------|--------------------------------------------------------------------------------------------------------------------------------------------------------------------------------------------|--------------------------------------------------------------------------------------------------------------------|-------|--------------------------------------------------------------------------------------------------------------------------------------------------------------------------------------------------------------------------------------|---------------------------------------------------------------------------------------------------|---------------------------------------------------------------------------------------------|---|----------------------------------------------|
| Major elective non-Cardiac surgery - Morbidity | Hu X. Y., 2021, China <sup>77</sup> - Secondary analysis of observational study, 531 pts                                                                                                   | Create a fully automated score based on ML to predict the incidence of Postoperative delirium                      | 1 - P | Demographics, Charlson comorbidity index, postoperative neutrophil-to-lymphocyte ratio, intraoperative blood loss, anaesthesia duration, extubating time, Intensive care unit admission, mini-mental state examination score (MMSE). | LR[*], RF, XGBoost, SVM - LR: AUC of 0.804, F1-score:0.567                                        | Internal validation with train-test split, 30% of the database used for testing             | 2 | NA                                           |
| Major elective non-Cardiac surgery - Morbidity | Jones R. N., 2021, USA <sup>79</sup> - Secondary analysis of observational study, 560 pts                                                                                                  | Prediction of cognitive decline from 2 to 36 months following elective surgery in a population with age > 70 years | 1 - P | Demographics, ASA score, perioperative blood values, perioperative vitals, type of surgery                                                                                                                                           | RR, MARS[*], RF, KNN, GBM, NN, LinR, LR - MARS: AUC of 0.76                                       | Internal validation with hold-out method, 20% of the database used for testing              | 2 | NA                                           |
| Major elective non-Cardiac surgery - Morbidity | Jungquist C. R., 2019, USA <sup>109</sup> - Prospective, single centre, 48 pts                                                                                                             | Predict opioid-induced respiratory depression in postoperative using electronic monitoring devices                 | 1 - P | Patient STOP-BANG questionnaire, length of surgery, postoperative measurement with electronic device measuring: pulse oximetry, Capnography, Minute Ventilation                                                                      | SVM - Detection rate > 0.9 over short horizons of event (< 5 minutes).                            | Method of validation not stated                                                             | 4 | STOP-BANG questionnaire                      |
| Major elective non-Cardiac surgery - Morbidity | Karri R., 2021, Australia <sup>72</sup> - Retrospective use of MIMIC-III database (national database but single centre based), 6040 pts                                                    | Prediction of postoperative atrial fibrillation (POAF) in ICU admitted pts                                         | 1 - P | Demographic, comorbidities, admission type                                                                                                                                                                                           | RF, DT, LR, KNN, SVM, GBM[*] - GBM: AUC of 0.74 (0.71–0.77), Sensitivity: 0.60, Specificity: 0.65 | Internal validation with five-fold cross-validation repeated 4 times                        | 2 | Comparison with the POAF score, AUC was 0.63 |
| Major elective non-Cardiac surgery - Morbidity | Koretsky M., 2022, USA <sup>52</sup> - Retrospective, multicentre, 6002257                                                                                                                 | develop scoring systems for the prediction of combined, early, and late postoperative intubation                   | 1 - P | Data from ACS-NSQIP, demographics, past medical history, type of surgery                                                                                                                                                             | LR, RF, GBM[*] - GBM: AUC 0.9037, Brier score 0.1226                                              | Internal validation, cross validation                                                       | 2 | NA                                           |
| Major elective non-Cardiac surgery - Morbidity | Kristinsson ÆÖ, 2022, Denmark <sup>26</sup> - Prospective, observational, multi centre, 292 pts                                                                                            | Use of continuous vital signal monitoring to predict postoperative outcomes                                        | 1 - P | Demographics, continuous postoperative vitals                                                                                                                                                                                        | KNN, DT, RF[*], BE - RF: AUC 0.65, Sensitivity 0.92, Specificity 0.36, F1-score 0.64              | Internal validation with 5-fold cross-validation                                            | 4 | NA                                           |
| Major elective non-Cardiac surgery - Morbidity | Li P., 2023, China <sup>93</sup> - Observational, cohort study, 2014 pts                                                                                                                   | Postoperative infection in elderly                                                                                 | 1 - P | Demographics, past medical history, type of surgery, type of anaesthesia, ASA score                                                                                                                                                  | NN[*], LR - NN: AUC 0.763, sensitivity 0.632, specificity 0.805                                   | Internal validation, 75/25                                                                  | 2 | LR                                           |
| Major elective non-Cardiac surgery - Morbidity | Mascarella M. A., 2022, Canada <sup>60</sup> - Retrospective, a cohort of the national surgical outcome database from ACS- NSQIP, 43701 pts                                                | Prediction of Major postoperative adverse events (MPAEs) in a perioperative head and neck surgery population       | 1 - P | Demographics, comorbidities, preoperative functional activity and drugs, ASA Score, type of surgery, wound classification, surgical time, tracheostomy                                                                               | LR[*], SVM, NN, RF - LR: AUC 0.85                                                                 | Internal validation with Hold-out method, no percentage of database used for testing stated | 2 | Modified frailty index 5, ASA score          |
| Major elective non-Cardiac surgery - Morbidity | Nudel J., 2021, USA <sup>69</sup> - Retrospective, cohort based on data from 2015-2017 Metabolic and Bariatric Surgery, Accreditation and Quality Improvement Program database, 436807 pts | Prediction of anastomotic leak and Venous Thromboembolism after bariatric surgery                                  | 1 - P | Demographics, comorbidities, ASA score, preoperative blood values, year of surgery, training level of the first assistant,                                                                                                           | ANN[*], XGBoost[*], LR - Predicting leak - ANN: AUC 0.75 - VTE - XGBoost: AUC 0.67                | Internal validation with Hold-out method, 25% of the database used for testing              | 2 | LR                                           |



|                                                |                                                                                                                                                                                  |                                                                                                                                                  |       |                                                                                                                                                                                    |                                                                                                                                                                                                                                                                                          |                                                                                                                                 |   |                                                       |
|------------------------------------------------|----------------------------------------------------------------------------------------------------------------------------------------------------------------------------------|--------------------------------------------------------------------------------------------------------------------------------------------------|-------|------------------------------------------------------------------------------------------------------------------------------------------------------------------------------------|------------------------------------------------------------------------------------------------------------------------------------------------------------------------------------------------------------------------------------------------------------------------------------------|---------------------------------------------------------------------------------------------------------------------------------|---|-------------------------------------------------------|
| Major elective non-Cardiac surgery - Morbidity | Oh A., 2023, South Korea <sup>74</sup> - Retrospective, single centre, 6811 pts                                                                                                  | Myocardial injury after non-cardiac surgery (MINS) prediction after non cardiac surgery                                                          | 1 - P | Demographics, past medical history, periooperative organ support, medication, cardiac troponin                                                                                     | XGB - XGB: AUC 0.74, accuracy 0.79, sensitivity 0.29, specificity 0.93                                                                                                                                                                                                                   | Internal validation, five-fold cross-validation                                                                                 | 2 | NA                                                    |
| Major elective non-Cardiac surgery - Morbidity | Peng X., 2022, China <sup>75</sup> - Prospective, single centre, 5705 pts                                                                                                        | Postoperative major adverse cardiovascular events (MACEs) in geriatric patients                                                                  | 1 - P | NYHA classification, laboratory data, demographics, past medical history                                                                                                           | RF, GBM, XGB[*], SVM, LR - XGB: AUC 0.870, AUROC 0.404, Brier Score 0.024                                                                                                                                                                                                                | Internal validation                                                                                                             | 4 | NA                                                    |
| Major elective non-Cardiac surgery - Morbidity | Racine A. M., 2020, USA <sup>80</sup> - Prospective, single centre, 560 pts                                                                                                      | Predict post operative delirium in elder population                                                                                              | 1 - P | Demographics, preoperative Laboratory results, surgical procedure, anaesthesia type and duration, inter and post operative medications                                             | LR, GBM, NN[*], RF, RR, Stepwise LR - NN: AUC 0.71, Specificity 0.82, Sensibility 0.50                                                                                                                                                                                                   | Internal validation with Hold-out method, 111 pts used for testing                                                              | 4 | Stepwise LR                                           |
| Major elective non-Cardiac surgery - Morbidity | Sobrie O., 2016, Belgium <sup>49</sup> - Retrospective, multicentre, 898 pts                                                                                                     | Proposing a multiple criteria decision aiding system to predict the patient's ASA score and the decision of accepting the patient for a surgery. | 1 - P | ASA score, demographics, preoperative blood values, comorbidities, preoperative vital signs, cerebrovascular accident, myocardial infarction                                       | Majority rule sorting model (multiple criteria sorting methods, a simplified version of ELECTRE Tri, an outranking sorting procedure) - Predicting ASA score - AUC of 0.98, predicting the decision of accepting the patient for a surgery - AUC of 0.75                                 | Internal validation with cross-validation performed with 3 different splits                                                     | 2 | SVM, C4.5, KNN, MLP, RBF, and Majority rule voting    |
| Major elective non-Cardiac surgery - Morbidity | Song Y., 2023, China <sup>82</sup> - Retrospective, single centre, 29756 pts                                                                                                     | Development of postoperative delirium in elderly patients                                                                                        | 1 - P | Demographics, past medical history, ASA score, type of surgery, type of anaesthesia, blood loss                                                                                    | LR[*], RF, GBM, Adaboost, XGB, ensemble model - LR: AUC 0.783, Sensitivity 0.74, specificity 0.70                                                                                                                                                                                        | Internal validation, 70/30 random split                                                                                         | 2 | NA                                                    |
| Major elective non-Cardiac surgery - Morbidity | Suhre W., 2020, USA <sup>31</sup> - Retrospective, multicentre, 27388 pts                                                                                                        | Identifying association of cannabis use with the risk of postoperative nausea and vomiting.                                                      | 2 - P | Demographics, ASA score, medical history, procedure duration, exposition to Nitrous Oxide, surgery risk for nausea, total number of prophylactic agents, PACU opioids, Apfel score | Bayesian Additive Regression Trees - Daily cannabis use: relative risk for postoperative nausea and vomiting was 1.19 (95 CI% 1.00– 1.45), absolute marginal increase in risk was 3.3% (95% CI 0.4–6.4%). Current, non-daily use of cannabis: relative risk was 1.07, 95% CI 0.94–1.21). | External validation with 16245 pts                                                                                              | 3 | Comparison with Bayesian logistic regression model    |
| Major elective non-Cardiac surgery - Morbidity | Tavolara T. E., 2021, USA <sup>34</sup> - Prospective, single centre, 152 pts                                                                                                    | Predict difficult intubation from frontal face images using deep learning models                                                                 | 1 - P | 11 facial regions, 68 landmarks of the face                                                                                                                                        | 11 CNN and 11 attention-based MIL making up a robust facial feature extractor (FRFE) - AUC 0.711, sensitivity 0.73, specificity 0.68                                                                                                                                                     | Internal validation with Hold-out method, 10% of the database used for testing                                                  | 4 | bedside Mallampati test and thyromental distance test |
| Major elective non-Cardiac surgery - Morbidity | Tourani R., 2019, USA <sup>32</sup> - Retrospective, multicentre using the national surgical outcome database (National Surgical Quality Improvement Program - NSQIP), 47089 pts | Predicting seven infectious post-surgical complications in 30 days post surgery.                                                                 | 3 - P | Demographics, history of complications, laboratory results and vitals, medications, high-resolution vitals and labs.                                                               | LR - Using only demographics and preoperative data - AUC of 0.560 - 0.877. Demographics, preoperative data and intraoperative data - AUC of 0.563 - 0.881                                                                                                                                | External validation - Model performance was compared between two different clinics - Bootstrap estimation with 200 replications | 3 | NA                                                    |

|                                                              |                                                                                                                                                                                                    |                                                                                                                                                                                                                                                                                   |       |                                                                                                                        |                                                                                                                                                                                                                                                                                                                                                                                         |                                                                                                                                                                                                                                                                    |   |                         |
|--------------------------------------------------------------|----------------------------------------------------------------------------------------------------------------------------------------------------------------------------------------------------|-----------------------------------------------------------------------------------------------------------------------------------------------------------------------------------------------------------------------------------------------------------------------------------|-------|------------------------------------------------------------------------------------------------------------------------|-----------------------------------------------------------------------------------------------------------------------------------------------------------------------------------------------------------------------------------------------------------------------------------------------------------------------------------------------------------------------------------------|--------------------------------------------------------------------------------------------------------------------------------------------------------------------------------------------------------------------------------------------------------------------|---|-------------------------|
| Major elective non-Cardiac surgery - Morbidity               | Walczak S., 2020, USA <sup>44</sup> - Retrospective, multi centre, 1600000 pts                                                                                                                     | Prediction of operative transfusion                                                                                                                                                                                                                                               | 1 - P | Data from ACS-NSQIP, demographics, past medical history, type of surgery                                               | ANN - AUC 0.858, sensitivity 0.75, specificity 0.70                                                                                                                                                                                                                                                                                                                                     | External validation with independent dataset                                                                                                                                                                                                                       | 3 | LR                      |
| Major elective non-Cardiac surgery - Morbidity               | Xie T., 2021, China <sup>99</sup> - Prospective, single centre, 48 pts                                                                                                                             | Predicting postoperative recovery of gastrointestinal function based on metabolomic profiling. Indicating potential mechanisms contributing to gastrointestinal function after surgical resection of colorectal cancer under the fluid management of goal-directed fluid therapy. | 1 - P | Perioperative metabolomics                                                                                             | SVM, DT, RF, GNB, ANN, LR[*], XGBoost - LR with 22 features: AUC 0.98, accuracy of 0.92                                                                                                                                                                                                                                                                                                 | Human validated                                                                                                                                                                                                                                                    | 4 | NA                      |
| Major elective non-Cardiac surgery - Morbidity               | Xue B., 2021, USA <sup>57</sup> - Retrospective, single centre, 111888 pts                                                                                                                         | Predicting the risk of postoperative complications related to pneumonia, acute kidney injury, deep vein thrombosis, pulmonary embolism, and delirium                                                                                                                              | 1 - P | Patient and clinical characteristics available preoperatively, intraoperatively, and a combination of both             | LR, SVM, RF, GBT[*], DNN - GBT: AUC 0.905, AUROC 0.208, sensitivity 0.525, specificity 0.95, F1-score 0.277, accuracy 0.941                                                                                                                                                                                                                                                             | Internal validation with 5 random shuffles of 5-fold cross-validation                                                                                                                                                                                              | 2 | NA                      |
| Major elective non-Cardiac surgery - Morbidity               | Zhang L., 2021, China <sup>51</sup> - Cross-sectional study on NSQIP database, 481 pts                                                                                                             | Screening of obstructive sleep apnoea (OSA) in a perioperative population using facio-cervical measurements                                                                                                                                                                       | 1 - P | Demographics, Faciocervical measurements                                                                               | SVM - SVM: AUC 0.83, sensitivity 0.89, specificity 0.76                                                                                                                                                                                                                                                                                                                                 | Internal validation with 10-fold cross-validation                                                                                                                                                                                                                  | 2 | STOP-BANG questionnaire |
| Major elective non-Cardiac surgery - Morbidity and Mortality | Bihorac A., 2019, USA <sup>98</sup> - Retrospective, single centre, 51457 pts                                                                                                                      | Postoperative complications (acute kidney injury, sepsis, venous thromboembolism, intensive care unit admission > 48 hours, mechanical ventilation > 48 h, wound, neurologic, cardiovascular complications) and death at 1-, 3-, 6-, 12-, and 24-months                           | 1 - P | 285 preoperative features, demographics, socio-economics, administrative, clinical, pharmacy, and laboratory variables | MySurgicalRisk model (Feng Z) - AUC ranging between 0.82 and 0.94, sensitivity 0.74, specificity 0.69, death at 1-, 3-, 6-, 12-, and 24-month - AUC ranging between 0.77 and 0.83                                                                                                                                                                                                       | Internal 50-time repeated 5-fold cross-validation runs                                                                                                                                                                                                             | 2 | NA                      |
| Major elective non-Cardiac surgery - Morbidity and Mortality | Bonde A., 2021, USA <sup>36</sup> - Retrospective, multiple centre from American College of Surgeons (ACS) National Surgical Quality Improvement Program database, 5881881 pts, emergency patients | Predicting mortality and 18 different morbidity postsurgery                                                                                                                                                                                                                       | 3 - P | From ACS - NSQIP, 58 features, demographic, laboratory values                                                          | 3 NN, of increased complexity. The three models were developed with 1 134 080, 1 186 327, and 1 264 846 trainable variables and 21, 35, and 57 embedding layers, respectively. - The mean AUCs for the validation set were 0.864 for model 1, 0.871 for model 2, and 0.882 for model 3. The mean AUCs for the test set were 0.859 for model 1, 0.863 for model 2, and 0.874 for model 3 | External validation with patients who were treated at a large US hospital, excluded them from the base dataset, and reserved this independent group for final model testing. Internal validation with a training set and a validation set from the remaining cases | 3 | NA                      |

|                                                              |                                                                                                                                                        |                                                                                                                                                                                                                                     |       |                                                                                                                                                                                                     |                                                                                                                                                                                        |                                                                                |   |                                                               |
|--------------------------------------------------------------|--------------------------------------------------------------------------------------------------------------------------------------------------------|-------------------------------------------------------------------------------------------------------------------------------------------------------------------------------------------------------------------------------------|-------|-----------------------------------------------------------------------------------------------------------------------------------------------------------------------------------------------------|----------------------------------------------------------------------------------------------------------------------------------------------------------------------------------------|--------------------------------------------------------------------------------|---|---------------------------------------------------------------|
| Major elective non-Cardiac surgery - Morbidity and Mortality | Chae D., 2022, South Korea <sup>61</sup> - Retrospective, single centre, 21510 pts                                                                     | To develop a risk scoring system for 1-week and 1-month mortality after major non-cardiac surgery, and assess the impact of postoperative factors on 1-week and 1-month mortality                                                   | 1 - P | Demographics, ASA, preoperative laboratory values, anaesthesia duration and type, intraoperative and postoperative laboratory values, transfusion, urine output, surgery type                       | penalized regression, RF, SVM, GBM, LightGBM [*] - (Pre-, intra-, and postoperative features) LightGBM: AUC 0.90, Brier score 0.014                                                    | Internal cross-validation                                                      | 2 | NA                                                            |
| Major elective non-Cardiac surgery - Morbidity and Mortality | Feng Z., 2017, USA <sup>29</sup> - Proposal for Intelligent Perioperative System (IPS) for real-time assessment of risk of postoperative complications | Proposal for Intelligent Perioperative System (IPS) for real-time assessment of risk of postoperative complications                                                                                                                 | - P   | NA                                                                                                                                                                                                  | Preliminary description of ML model (MySurgeryRisk) based on the Generative Additive Model (GAM). - NA                                                                                 | Method of validation not stated                                                | 1 | NA                                                            |
| Major elective non-Cardiac surgery - Morbidity and Mortality | Hofer I.S., 2020, USA <sup>53</sup> - Retrospective, single centre, 59981 pts                                                                          | Predict postoperative mortality, acute kidney injury, and reintubation                                                                                                                                                              | 1 - P | 46 features available at the end of the surgery, including drug dosing, blood loss, vital signs, and others were extracted, six additional features accounting for total intraoperative hypotension | DNN - DNN: AUC 0.792 for AKI, 0.879 for reintubation, 0.907 for mortality, and 0.874 for any outcome. Average F1-score 0.47                                                            | Internal validation 80/20                                                      | 2 | LR, ASA, risk stratification index, risk quantification index |
| Major elective non-Cardiac surgery - Morbidity and Mortality | MacKay E., 2021, USA <sup>41</sup> - Retrospective, cohort study, 38539 pts                                                                            | Primary outcome was 30-day mortality. Secondary outcomes were: rehospitalization, and any of 23 adverse clinical events occurring within 30 days of the index admission date.                                                       | 1 - P | Feature from patients extracted from a random 5% sample from Medicare beneficiaries encompassing fee-for-service (FFS) claims data—Parts A/B claims from 2008–2011                                  | SVM, RF, NN, XGB[*], LR - XGB Mortality: AUC 0.73, Brier Score 0.07, XGB Morbidity: AUC 0.78, Brier Score 0.01                                                                         | External validation with second independent validation dataset                 | 3 | NA                                                            |
| Major elective non-Cardiac surgery - Mortality               | Chen P.F., 2022, Taiwan <sup>121</sup> - Retrospective, single centre, 121313 pts                                                                      | To develop a fusion natural language model containing structured and unstructured (text) features to predict the in-hospital 30-day postoperative mortality before surgery, using preoperative diagnosis and the planned procedure. | 3 - P | Demographics, comorbidities, preoperative laboratory data, preoperative vital signs, ASA score, type of surgery                                                                                     | BERT-DNN[*], DNN, RF, XGBoost, LR - BERT-DNN: AUC 0.96, AUPRC 0.31                                                                                                                     | Internal validation with hold-out method. 16 267 samples were used for testing | 2 | American Society of Anesthesiologist Physical Status.         |
| Major elective non-Cardiac surgery - Mortality               | COVIDSurg Collaborative, 2021, international panel <sup>123</sup> - Prospective, international, prospective, cohort study, 8492 pts                    | To develop and validate a machine learning based risk score to predict postoperative mortality risk in patients with perioperative SARS-CoV-2 infection                                                                             | 3 - P | Demographics, preoperative respiratory support, ASA score, revised cardiac risk index (RCRI) score.                                                                                                 | RF, DT, GLM, LR[*] - 26 models using different combinations of five selected features - LR with 4 features: AUC 0.80                                                                   | External validation using Time-based database split for validation             | 4 | PROBAST assessment                                            |
| Major elective non-Cardiac surgery - Mortality               | Fritz B. A., 2019, USA <sup>113</sup> - Retrospective, single centre, 95907 pts                                                                        | Real time prediction of postoperative 30 days mortality using neural network models                                                                                                                                                 | 1 - P | Demographics, comorbidities, preoperative vital signs, preoperative laboratory values, intraoperative vital signs, intraoperative ventilator parameters, medications and fluids                     | MPCNN-LSTM[*], MPCNN-CNN, DNN, RF, SVM, LR - MPCNN-LSTM: AUC of 0.867, AUPRC: 0.095, MPCNN-CNN: AUC of 0.855, DNN: AUC of 0.825, RF: AUC of 0.848, SVM: AUC of 0.836, LR: AUC of 0.837 | Method of validation not stated                                                | 2 | LR                                                            |
| Major elective non-Cardiac surgery - Mortality               | Hill B. L., 2019, USA <sup>115</sup> - Retrospective, single centre, 53097 pts                                                                         | Prediction of mortality using data available at the time of surgery                                                                                                                                                                 | 1 - P | Demographics, comorbidities, perioperative blood analysis and vitals, ASA, type of anaesthesia, type of surgery                                                                                     | LR, ElasticNet LR, RF[*], XGBoost - RF: AUC: 0.936, F1-score: 0.275, Precision 0.610, Specificity:0.998                                                                                | Internal validation with five-fold cross-validation                            | 2 | POSSUM, ASA, Charlson comorbidity scores                      |

|                                                               |                                                                                                                        |                                                                                                                                                                                                                                                                                                 |       |                                                                                                                                                        |                                                                                                                                                |                                                                                                 |   |                                                                                                            |
|---------------------------------------------------------------|------------------------------------------------------------------------------------------------------------------------|-------------------------------------------------------------------------------------------------------------------------------------------------------------------------------------------------------------------------------------------------------------------------------------------------|-------|--------------------------------------------------------------------------------------------------------------------------------------------------------|------------------------------------------------------------------------------------------------------------------------------------------------|-------------------------------------------------------------------------------------------------|---|------------------------------------------------------------------------------------------------------------|
| Major elective non-Cardiac surgery - Mortality                | Lee C. K., 2021, USA <sup>119</sup> - Retrospective, single centre, 59985 pts                                          | Use of interpretable neural network to predict postoperative in-hospital mortality                                                                                                                                                                                                              | 1 - P | Demographics, ASA score, type of anaesthesia, invasive anaesthesia procedure (arterial line, etc), type of surgery, medication and vitals post-surgery | GAM-NN[*], LR - With Healthcare Cost and Utilization Project (HCUP) features - GAM-NN: AUC of 0.92. Without HCUP features: GAM-NN: AUC of 0.91 | Internal validation with hold-out validation method, 11997 pts used for testing                 | 2 | With HCUP LR: AUC of 0.91, without HCUP features LR: AUC of 0.906                                          |
| Major elective non-Cardiac surgery - Mortality                | Lee SW, 2022, South Korea <sup>112</sup> - Retrospective, Multiple Centres, 454404 pts, elective and emergency surgery | 30 days mortality after a non-cardiac surgery                                                                                                                                                                                                                                                   | 3 - P | Preoperative medications, medical comorbidities, laboratory data                                                                                       | LG, RF, XGB[*], NN - XGB: AUROC=0.942, AUPRC=0.175                                                                                             | External validation, bootstrapping and grid search with tenfold cross-validation were performed | 3 | NA                                                                                                         |
| Major elective non-Cardiac surgery - Mortality                | Shin S., 2021, South Korea <sup>120</sup> - Retrospective, Single Centres, 7629 pts                                    | 30 days Mortality due to Myocardial injury after non-cardiac surgery                                                                                                                                                                                                                            | 1 - P | Preoperative medications, medical comorbidities, laboratory data                                                                                       | XGB, GBM, RF[*], SVM, KNN, LR - RF: AUC 0.927, F1-score 0.549                                                                                  | Internal validation, 5 fold cross validation                                                    | 2 | ASA, Possum score                                                                                          |
| Major elective non-Cardiac surgery - Mortality                | Yun K., 2021, South Korea <sup>118</sup> - Retrospective, single centre, 1384 pts                                      | Predicting unexpected postoperative mortality within 30 days of the surgery or within the same hospital stay as the surgery                                                                                                                                                                     | 1 - P | Demographics, laboratory results, disease-specific variables, type of surgery, operation name, operation time, blood loss, hemodynamic variables       | NB, NN[*], DT, RF, Hellinger Distance DT, Hellinger Distance RF - NN: AUC 0.80, F1-score 0.83                                                  | Internal validation with tenfold cross-validation                                               | 2 | NA                                                                                                         |
| Major elective non-Cardiac surgery - Procedural               | Van de Sande D, 2021, Netherlands <sup>131</sup> - Retrospective, single center, 1174 pts                              | predict safe hospital discharge after the second postoperative day                                                                                                                                                                                                                              | 1 - P | Demography, past medical history, diagnosis                                                                                                            | RF - RF: AUROC 0.88, sensitivity 0.79, specificity 0.80                                                                                        | Internal validation, dataset divided in train, validate, and test                               | 2 | NA                                                                                                         |
| Major elective non-Cardiac surgery - Procedural               | Van de Sande D., 2022, Netherlands <sup>43</sup> - Retrospective, multiple centre, 1693 pts                            | Predict safe hospital discharge after the second postoperative day                                                                                                                                                                                                                              | 2 - P | Demography, past medical history, diagnosis                                                                                                            | RF (Van de Sande D., 2021) - RF: AUROC 0.83, sensitivity 0.78, specificity 0.79                                                                | External validation, train (70%), validation (20%), and test data set (10%)                     | 3 | NA                                                                                                         |
| Major elective non-Cardiac surgery - Procedural and Mortality | Chiew C. J., 2020, Singapore <sup>114</sup> - Retrospective, cohort, single centre, 90785 pts                          | Compare the performance of ML models against the traditional derived Combined Assessment of Risk Encountered in Surgery (CARES) and the American Society of Anaesthesiologists-Physical Status (ASA-PS) in predicting 30-day postsurgical mortality and need for intensive care unit > 24 hours | 2 - P | Demographics, comorbidities, preoperative laboratory results, surgery type                                                                             | RF, AdaBoost, GBM[*], SVM - Mortality - GBM: AUC of 0.96 - ICU Admission: GBM: AUC of 0.95, AUPRC:0.38                                         | Internal validation with hold-out method, 30% of the database used for testing                  | 2 | American Society of Anaesthesiologists-Physical Status, Combined Assessment of Risk Encountered in Surgery |
| Major surgery non-Cardiac surgery - Morbidity                 | Dolendo I. M., 2022, USA <sup>88</sup> - Retrospective, cohort, single centre, 148 pts                                 | To identify risk factors and develop machine-learning-based models to predict pts who are at higher risk for postoperative opioid use after mastectomy.                                                                                                                                         | 1 - P | Demographics, transgender, postmenopausal, ASA score, drug use, type of surgery                                                                        | Multivariable LR, ridge regression, lasso, elastic net regression [*] - Elastic net regression: AUC of 0.80                                    | Hosmer-Lemeshow to asses goodness-of-fit, internal validation by 10 fold cross-validation       | 2 | Multivariable LR with variable selection used as a reference model                                         |
| Major surgery non-Cardiac surgery - Morbidity                 | Zeng S., 2021, China <sup>58</sup> - Retrospective, single centre, 175 pts                                             | Predict postoperative complication in liver resection patients                                                                                                                                                                                                                                  | 1 - P | Demographics, past medical history, bleeding, transfusion, duration of surgery, type of surgery, type of incision, tumour dimension and number         | LR, Decision tree, SVM, RF - Decision tree C5.0: AUC 0.92, sensitivity 0.87, Specificity 0.94                                                  | Internal validation, 70/30 split                                                                | 2 | NA                                                                                                         |

|                                                               |                                                                                         |                                                                                                                                                           |       |                                                                                                                                                                         |                                                                                                                                                                                                                                                                       |                                                                                                           |   |                                                  |
|---------------------------------------------------------------|-----------------------------------------------------------------------------------------|-----------------------------------------------------------------------------------------------------------------------------------------------------------|-------|-------------------------------------------------------------------------------------------------------------------------------------------------------------------------|-----------------------------------------------------------------------------------------------------------------------------------------------------------------------------------------------------------------------------------------------------------------------|-----------------------------------------------------------------------------------------------------------|---|--------------------------------------------------|
| Minor/moderate non-cardiac surgery - Morbidity                | Park K., 2022, South Korea <sup>30</sup> - Retrospective, single centre, 7833 pts       | Prediction of aspiration pneumonia after gastric endoscopic submucosal dissection                                                                         | 1 - P | Demographics, ASA score, comorbidities, procedure time, sedation time, recovery time, location of the lesion, tumour size, haemodynamic during sedation, sedative drugs | multivariable LR, XGBoost[*], Elastic Net, RF, NN, SVM - XGBoost: AUC 0.74                                                                                                                                                                                            | Internal validation with hold-out method, 30% of the database used for testing                            | 2 | NA                                               |
| Minor/moderate non-cardiac surgery - Morbidity and Procedural | Gabriel R.A., 2022, USA <sup>70</sup> - Retrospective, single centre, 1333 pts          | Develop machine learning algorithms incorporating pain and opioid features to predict the need for outpatient opioid refills following ambulatory surgery | 1 - P | Demographics, past medical history, type of anaesthesia, type of surgery, pain score                                                                                    | LR, NN[*], SVM, RF, with and without SMOTE - NN with SMOTE: AUC 0.711, F1-score 0.347, sensitivity 0.693, specificity 0.979                                                                                                                                           | Internal validation using k-fold cross validation                                                         | 2 | NA                                               |
| Orthopedic Surgery - Morbidity                                | Castle J. P., 2022, USA <sup>11</sup> - Retrospective, single center, 581 pts           | Identify prognostic factors for continued opioid use after arthroscopic meniscus surgery                                                                  | 1 - P | Demographics, comorbidities, procedure details, intra-operative Outerbridge Classification of arthritis severity                                                        | NB - NB: AUC 0.79, Brier score 0.12, sensitivity 0.95, PPV 0.83, detection rate 0.78, NPV 0.20, specificity 0.07                                                                                                                                                      | Internal validation, split 70/30                                                                          | 2 | Univariate and multivariate Cox-regression model |
| Orthopedic Surgery - Morbidity                                | Gabriel R. A., 2022, USA <sup>69</sup> - Retrospective, cohort, single centre, 1042 pts | Predict the risk of persistent opioid use following lower extremity joint arthroplasty                                                                    | 1 - P | Demographics, preoperative opioid use, comorbidities, type of surgery, intraoperative medications, type of anaesthesia, postoperative medications                       | LR, BRF[*], BB[*], RF[*], MLP, SVM - BRF: AUC of 0.959, F1-score: 0.841, BB: AUC of 0.959, RF: AUC of 0.959                                                                                                                                                           | Internal validation with stratified 10-fold cross-validation                                              | 2 | LR without SMOTE used as a reference             |
| Orthopedic Surgery - Morbidity                                | Ko S., 2020, South Korea <sup>40</sup> - Retrospective, multicentre, 5757 pts           | Prediction of Acute Kidney Injury after total knee arthroplasty                                                                                           | 1 - P | Demographic, ASA score, comorbidities, preoperative medication, perioperative blood values, type of surgery, type of anaesthesia                                        | GBM - GBM: AUC of 0.89, Sensitivity 0.65, Specificity 0.77                                                                                                                                                                                                            | External Validation with third hospital dataset - Internal validation Stratified 10-fold cross-validation | 3 | NA                                               |
| Orthopedic Surgery - Morbidity                                | Kunze K. N., 2022, USA <sup>66</sup> - Retrospective, multicentre, 616 pts              | Predicting all cause complications within two years of primary total hip arthroplasty (THA)                                                               | 1 - P | Demographics, comorbidities, preoperative modified Harris Hip Score, preoperative hip flexion                                                                           | Stochastic Gradient Boosting (SGB), RF, SVM, NN, LR - SGB: AUC 0.86, Brier Score 0.09                                                                                                                                                                                 | Internation validation with tenfold cross-validation                                                      | 2 | NA                                               |
| Orthopedic Surgery - Morbidity                                | Zhao H., 2021, China <sup>78</sup> - Retrospective, single centre, 245 pts              | Predicting delirium after elderly hip fracture surgeries.                                                                                                 | 1 - P | Demographics, comorbidities, preoperative values, surgery duration, type of anaesthesia                                                                                 | LR, RF, XGBoost, SVM, MLP - Accuracy for 4 models between 0.8a and 0.88, AUC reported only for LR: 0.78                                                                                                                                                               | Internal validation with 5-fold cross-validation                                                          | 2 | LR                                               |
| Orthopedic Surgery - Mortality                                | Kitcharanant N., 2022, Thailand <sup>116</sup> - Retrospective, single centre, 492 pts  | Predicting 1-year mortality after fragility hip fracture                                                                                                  | 1 - P | Demographics, type of fracture, type of treatment, comorbidities, time to surgery                                                                                       | GB, NN, RF[*], LR, SVM, NB, KNN - RF: AUC 0.95, sensitivity 0.68, specificity 0.99                                                                                                                                                                                    | Internal validation, splitting random ratio 70/30                                                         | 2 | NA                                               |
| Orthopedic Surgery - Mortality                                | McLeod G., 2022, UK <sup>117</sup> - Retrospective, single centre, 329 pts              | Creation of web-based dynamic nomogram to Predict 1 year mortality after hip fracture surgery                                                             | 1 - P | Demographics, ASA score, preoperative blood values, socioeconomic status, length of surgery, procedure urgency, total time in theatre                                   | Global Cox proportional hazards model using all available covariates, a final Cox proportional hazards model, GLM, LR - Cox proportional hazards model and logistic models showed good discrimination, with concordance index values of 0.732 and 0.781, respectively | Internal validation with Hold-out method, 30% of the Database used for testing                            | 2 | Nottingham Hip Fracture Score                    |

|                                           |                                                                                                                                                                                    |                                                                                                                                                                              |       |                                                                                                                              |                                                                                                                                                                                                                                   |                                                                                                                      |   |                                 |
|-------------------------------------------|------------------------------------------------------------------------------------------------------------------------------------------------------------------------------------|------------------------------------------------------------------------------------------------------------------------------------------------------------------------------|-------|------------------------------------------------------------------------------------------------------------------------------|-----------------------------------------------------------------------------------------------------------------------------------------------------------------------------------------------------------------------------------|----------------------------------------------------------------------------------------------------------------------|---|---------------------------------|
| Orthopedic Surgery - Procedural           | Abbas A., 2022, Canada <sup>130</sup> - Retrospective, multiple centre from American College of Surgeons (ACS) National Surgical Quality Improvement Program database, 302.300 pts | Duration of surgery (DOS) and Length of Stay (LOS) after total knee arthroplasty                                                                                             | 1 - P | Demographics, comorbidities, ASA score, transfusion, type of anesthesia, dyspnea                                             | Linear, tree-based and multilayer perceptron (MLP) - MLP: mean square error for DOS 0.92 and LOS 0.72                                                                                                                             | The dataset was split into training, validation, and testing based on year. Hyperparameters tuned on validation set. | 2 | Mean regressor                  |
| Orthopedic Surgery - Procedural           | Ezuma C. O., 2022, USA <sup>125</sup> - Retrospective, multicentre data from NSQIP database, 1307 pts                                                                              | To determine which ML is more precise in identifying the risk factors for unplanned overnight admission after knee surgery                                                   | 1 - P | Demographics, ASA score, comorbidities, preoperative laboratory values, surgery characteristics                              | RF, XGBoost, AdaBoost, elastic net penalized LR, weighted ensemble of those 4 algorithms [*] - Ensemble of 4 algorithms: AUC of 0.722, results for other models not stated                                                        | Internal validation with bootstrapping with 1000 resamples.                                                          | 2 | LR                              |
| Orthopedic Surgery - Procedural           | Gabriel R. A., 2019, USA <sup>124</sup> - Retrospective, single centre, 1018 pts                                                                                                   | Prediction of length of Stay after total hip arthroplasty                                                                                                                    | 1 - P | Demographics, comorbidities, perioperative opioid use, type of anaesthesia, surgical approach                                | LR[*], RF[*], KNN, SVM[*], Light GBM, XGBoost, MLP - best results for 3 different outcomes. Primary composite adverse outcomes - SVM: AUC of 0.716, ICU admission - LR: AUC of 0.791, prolonged length-of-stay - RF: AUC of 0.854 | Internal validation with hold-out method, 30% of the database used for testing                                       | 2 | NA                              |
| Orthopedic Surgery - Procedural           | Li H., 2022, China <sup>128</sup> - Retrospective, single centre, 1826 pts                                                                                                         | Prediction on length of stay post total knee arthroplasty                                                                                                                    | 1 - P | Demographics, preoperative blood values, comorbidities, ASA score,, type of anaesthesia, operation duration                  | LR, XGBoost[*] - XGBoost: AUC 0.66 (14 features) and 0.74 (7 features)                                                                                                                                                            | Method of validation not stated                                                                                      | 2 | NA                              |
| Orthopedic Surgery - Procedural           | Lu Y., 2020, USA <sup>126</sup> - Retrospective review of national surgical outcomes databases (National Surgical Quality Improvement Program - NSQIP), 4709 pts                   | Predict overnight hospital admission after anterior cruciate ligament reconstruction                                                                                         | 1 - P | Demographics, ASA score, comorbidities, preoperative blood values, perioperative functional status, operation time           | XGBoost, RF, AdaBoost, LDC and ensemble of 4 other models[*] - Ensemble: AUC 0.759                                                                                                                                                | Internal validation with Monte Carlo cross-validation                                                                | 2 | NA                              |
| Orthopedic Surgery - Procedural           | Song B. M., 2021, USA <sup>127</sup> - Retrospective, multicentre, 1276 pts                                                                                                        | Identifying patient characteristics and risk factors for overnight admission, identifying pts requiring overnight admission                                                  | 1 - P | Demographics, ASA score, comorbidities, medical history, preoperative laboratory values, surgery length, type of anaesthesia | GLM,RF, XGBoost, AdaBoost, Elastic-Net, weighted ensemble of the four algorithms [*] - Weighted ensemble of the four algorithms: 0.709                                                                                            | Internal validation with 10 fold cross validation with 3 repeats                                                     | 2 | Models compared with each other |
| Orthopedic Surgery - Procedural           | Sridhar S., 2022, USA <sup>129</sup> - Retrospective, single centre, 158 pts                                                                                                       | Predict Length of stay for total joint replacements                                                                                                                          | 1 - P | Duke score, type of procedure, demographics, past medical history, socio-economics features                                  | RF - Root mean square error: 0.7                                                                                                                                                                                                  | Internal validation 80/20 split                                                                                      | 2 | NSQIP calculator                |
| Spinal surgery - Morbidity and Procedural | Cabrera A., 2023, USA <sup>62</sup> - Retrospective, multi centre, 29949 pts                                                                                                       | Predict and describe length of stay, readmission, reoperation, transfusion, and infection rates following elective posterior cervical decompression with instrumented fusion | 1 - P | From ACS-NSQIP database, demographics, past medical history, surgery info, transfusion                                       | RF - RF (transfusion): AUC 0.902, accuracy 0.76, sensitivity 0.88, specificity 0.75                                                                                                                                               | Internal validation. Each model adopted a stratified tenfold cross-validation                                        | 2 | NA                              |

|                              |                                                                                           |                                                                                                                                                      |       |                                                                                                                                                  |                                                                                                                                                                |                                                                                         |   |           |
|------------------------------|-------------------------------------------------------------------------------------------|------------------------------------------------------------------------------------------------------------------------------------------------------|-------|--------------------------------------------------------------------------------------------------------------------------------------------------|----------------------------------------------------------------------------------------------------------------------------------------------------------------|-----------------------------------------------------------------------------------------|---|-----------|
| Spinal surgery - Procedural  | Gabrial R.A., 2023, USA <sup>132</sup> - Retrospective, single centre, 3189 pts           | Case duration spinal surgery                                                                                                                         | 1 - P | Demographics, Past medical history, type of surgery, ASA score                                                                                   | LR (multivariable), RF, XGB regressor, KNN - XGB regressor: variance score of 0.778, an $R^2$ of 0.770, an RMSE of 92.95 minutes, and an MAE of 44.31 minutes. | Internal validation using k-fold cross validation                                       | 2 | LR        |
| Vascular surgery - Morbidity | Bai P., 2020, China <sup>73</sup> - Retrospective, single centre, 443 pts                 | Incidence of cerebral infarction and myocardial infarction                                                                                           | 1 - P | Demographics, preoperative neurological symptoms, preoperative degree of vessel stenosis, intraoperative pressure, time of occlusion, shunt, LOS | XGBoost - Accuracy 0.94                                                                                                                                        | Internal cross-validation. Patients negative for the outcome were used as control group | 2 | NA        |
| Vascular surgery - Morbidity | Filiberto A. C., 2021, USA <sup>64</sup> - Retrospective, cohort, single centre, 1531 pts | Risk of postoperative acute kidney injury after major vascular surgery using MySurgeryRisk platform                                                  | 1 - P | Demographics, comorbidities, ASA score, type of surgery                                                                                          | MySurgeryRisk algorithm (Feng Z) - MySurgeryRisk: AUC 0.77, accuracy 0.17, AUPRC 0.70                                                                          | Internal validation with 1000 Bootstrap cohort                                          | 2 | ASA score |
| Vascular surgery - Morbidity | Tan J., 2020, China <sup>97</sup> - Retrospective, single centre, 406 pts                 | Prediction of early phase postoperative hypertension (EPOH) requiring administration of intravenous vasodilators after carotid endarterectomy (CEA). | 1 - P | Demographics, comorbidities, postoperative values                                                                                                | GBM - GBM: AUC 0.77, sensitivity 0.90, specificity 0.52                                                                                                        | Internal validation with four-fold stratified cross                                     | 2 | NA        |
