# Supplementary material for: Prediction of Complications and Prognostication in Perioperative Medicine: A Systematic Review and PROBAST Assessment of Machine Learning Tools
Source: PubMed Central journal article supplement (PMC11146190; doi:10.1097/aln.0000000000004764), 2023-11-09
Supplement: aln-140-85-s002.pdf [file aln-140-85-s002.pdf]

**Supplementary Table 2** : Summary of Risk of Bias and Applicability Assessment for Different Domains According to the PROBAST Tool.

| <b>Author, year, country</b>                      | <b>ROB - Participant</b> | <b>ROB - Predictors</b> | <b>ROB - Outcome</b> | <b>ROB - Analysis</b> | <b>Applicability - Participants</b> | <b>Applicability - Predictors</b> | <b>Applicability - Outcome</b> | <b>ROB</b> | <b>Applicability</b> |
|---------------------------------------------------|--------------------------|-------------------------|----------------------|-----------------------|-------------------------------------|-----------------------------------|--------------------------------|------------|----------------------|
| Abbas A., 2022, Canada <sup>130</sup>             | +                        | -                       | +                    | +                     | +                                   | +                                 | +                              | -          | +                    |
| Adhikari L., 2019, USA <sup>87</sup>              | -                        | ?                       | +                    | +                     | +                                   | -                                 | +                              | -          | -                    |
| Awadalla S. S., 2022, USA <sup>67</sup>           | +                        | -                       | -                    | -                     | +                                   | -                                 | -                              | -          | -                    |
| Bai P., 2020, China <sup>73</sup>                 | ?                        | -                       | ?                    | ?                     | +                                   | -                                 | +                              | ?          | -                    |
| Bertsimas D., 2018, USA <sup>63</sup>             | -                        | ?                       | +                    | ?                     | +                                   | +                                 | +                              | ?          | +                    |
| Bihorac A., 2019, USA <sup>98</sup>               | -                        | +                       | +                    | +                     | +                                   | -                                 | +                              | -          | -                    |
| Bishara A., 2021, USA <sup>81</sup>               | -                        | ?                       | +                    | +                     | +                                   | +                                 | +                              | -          | +                    |
| Bishara A., 2022, USA <sup>76</sup>               | -                        | +                       | +                    | +                     | +                                   | +                                 | +                              | -          | +                    |
| Bolourani S., 2020, USA <sup>83</sup>             | -                        | ?                       | -                    | -                     | +                                   | +                                 | +                              | -          | +                    |
| Bonde A., 2021, USA <sup>36</sup>                 | -                        | -                       | -                    | -                     | +                                   | +                                 | +                              | -          | +                    |
| Brennan M., 2019, USA <sup>33</sup>               | +                        | +                       | +                    | -                     | +                                   | +                                 | +                              | -          | +                    |
| Cabrera A., 2023, USA <sup>62</sup>               | +                        | +                       | ?                    | ?                     | +                                   | +                                 | +                              | ?          | +                    |
| Cartailler J., 2019, France <sup>100</sup>        | +                        | +                       | -                    | -                     | +                                   | -                                 | +                              | -          | -                    |
| Castela Forte J., 2021, Netherland <sup>110</sup> | -                        | -                       | +                    | +                     | +                                   | -                                 | +                              | -          | -                    |

|                                                                   |   |   |   |   |   |   |   |   |   |
|-------------------------------------------------------------------|---|---|---|---|---|---|---|---|---|
| Castela Forte J., 2022, Netherland <sup>111</sup>                 | - | + | + | + | + | - | + | + | - |
| Castle J. P., 2022, USA <sup>71</sup>                             | + | - | - | + | + | + | + | - | + |
| Chae D., 2022, South Korea <sup>61</sup>                          | - | ? | + | + | + | + | + | - | + |
| Chelazzi C., 2021, Italy <sup>54</sup>                            | - | + | + | - | + | + | + | - | + |
| Chen C, 2023, China <sup>91</sup>                                 | + | + | + | - | + | + | + | + | + |
| Chen C., 2021, China <sup>37</sup>                                | - | + | + | - | + | + | + | - | + |
| Chen P.F., 2022, Taiwan <sup>121</sup>                            | - | + | + | ? | + | - | + | - | - |
| Chiew C. J., 2020, Singapore <sup>114</sup>                       | - | + | + | - | + | + | + | + | + |
| COVIDSurg Collaborative, 2021, international panel <sup>123</sup> | + | + | + | - | - | + | - | + | - |
| Dolendo I. M., 2022, USA <sup>68</sup>                            | - | + | ? | ? | + | + | - | ? | - |
| Du Y., 2022, China <sup>94</sup>                                  | - | - | - | - | - | + | + | - | - |
| EI Hechi M.W, 2021, USA <sup>39</sup>                             | + | ? | + | ? | + | + | + | ? | + |
| Ezuma C. O., 2022, USA <sup>125</sup>                             | + | + | ? | ? | + | - | - | ? | - |
| Fernandes M. P. B., 2021, USA <sup>48</sup>                       | - | ? | ? | - | + | - | + | ? | - |
| Filiberto A. C., 2021, USA <sup>84</sup>                          | - | + | + | ? | + | + | + | - | + |
| Fritz B. A., 2019, USA <sup>113</sup>                             | - | + | + | + | + | + | + | - | + |

|                                                 |   |   |   |   |   |   |   |   |   |
|-------------------------------------------------|---|---|---|---|---|---|---|---|---|
| Gabrial R.A., 2023, USA <sup>132</sup>          | - | ? | + | - | - | - | + | ? | - |
| Gabriel R. A., 2019, USA <sup>124</sup>         | - | + | - | + | + | + | + | - | + |
| Gabriel R. A., 2022, USA <sup>69</sup>          | - | + | + | + | + | + | + | - | + |
| Gabriel R.A., 2022, USA <sup>70</sup>           | - | - | - | ? | + | - | - | ? | - |
| Gao J., 2021, USA <sup>122</sup>                | - | - | + | + | + | + | + | - | + |
| Gao Y., 2022, China <sup>64</sup>               | - | - | - | - | + | + | + | - | + |
| Hatib F., 2018, USA <sup>27</sup>               | + | + | ? | ? | + | - | + | + | - |
| Hill B. L., 2019, USA <sup>115</sup>            | - | + | + | ? | + | + | + | ? | + |
| Hofer I.S., 2020, USA <sup>53</sup>             | - | - | ? | + | + | + | + | - | + |
| Hu X. Y., 2021, China <sup>77</sup>             | + | + | - | + | + | - | + | + | - |
| Jacquet-Lagrece M., 2019, France <sup>101</sup> | + | + | + | ? | + | + | + | ? | + |
| Jeong Y. S., 2021, South Korea <sup>55</sup>    | - | + | + | ? | + | + | + | ? | + |
| Jiang H., 2021, China <sup>56</sup>             | - | + | + | ? | + | + | + | - | + |
| Jones R. N., 2021, USA <sup>79</sup>            | + | + | ? | ? | + | + | + | ? | + |
| Jungquist C. R., 2019, USA <sup>109</sup>       | - | + | + | ? | + | + | + | ? | + |
| Kamaleswaran R., 2021, USA <sup>92</sup>        | - | + | + | ? | + | - | + | - | - |

|                                                |   |   |   |   |   |   |   |   |   |
|------------------------------------------------|---|---|---|---|---|---|---|---|---|
| Kang A. R., 2020, South Korea <sup>102</sup>   | - | ? | + | ? | + | + | + | ? | + |
| Karri R., 2021, Australia <sup>72</sup>        | + | + | + | ? | + | ? | + | + | ? |
| Kendale S., 2018, USA <sup>106</sup>           | - | + | + | - | + | + | + | - | + |
| Kitcharanant N., 2022, Thailand <sup>116</sup> | - | ? | + | ? | + | + | + | ? | + |
| Ko S., 2020, South Korea <sup>40</sup>         | - | + | + | + | + | + | + | + | + |
| Koretsky M., 2022, USA <sup>52</sup>           | + | - | - | + | + | + | + | - | + |
| Kristinsson ÆÖ, 2022, Denmark <sup>26</sup>    | + | + | ? | - | + | + | + | ? | + |
| Kunze K.N., 2022, USA <sup>66</sup>            | + | - | - | - | + | + | + | - | + |
| Lee C. K., 2021, USA <sup>119</sup>            | - | + | + | - | + | + | + | - | + |
| Lee H. C., 2018, South Korea <sup>85</sup>     | - | ? | + | ? | + | ? | + | ? | ? |
| Lee H. C., 2018, South Korea <sup>86</sup>     | - | + | + | ? | + | + | + | ? | + |
| Lee S., 2021, South Korea <sup>105</sup>       | - | + | + | + | + | - | + | - | - |
| Lee SW, 2022, South Korea <sup>112</sup>       | - | + | - | + | + | + | + | - | + |
| Li H., 2022, China <sup>128</sup>              | - | + | + | ? | + | + | + | ? | + |
| Li P., 2023, China <sup>93</sup>               | + | - | + | ? | + | + | + | ? | + |
| Li T., 2022, China <sup>88</sup>               | - | - | + | ? | + | ? | + | ? | ? |

|                                              |   |   |   |   |   |   |   |   |   |
|----------------------------------------------|---|---|---|---|---|---|---|---|---|
| Li X. F., 2021, China <sup>50</sup>          | ? | ? | ? | ? | + | ? | + | ? | ? |
| Lu Y., 2020, USA <sup>126</sup>              | ? | + | ? | + | + | + | + | ? | + |
| Lundberg S. M., 2018, USA <sup>108</sup>     | ? | + | + | - | + | + | + | - | + |
| MacKay E., 2021, USA <sup>41</sup>           | + | + | + | ? | + | + | + | - | + |
| Maheshwari K., 2020, USA <sup>104</sup>      | + | + | + | - | + | - | + | - | - |
| Mascarella M. A., 2022, Canada <sup>60</sup> | + | + | ? | ? | + | + | + | ? | + |
| McLeod G., 2022, UK <sup>117</sup>           | ? | + | + | ? | + | + | + | ? | + |
| Misic V., 2020, USA <sup>42</sup>            | - | + | + | + | + | + | + | + | + |
| Nudel J., 2021, USA <sup>59</sup>            | + | + | - | + | + | + | + | - | + |
| Oh A., 2023, South Korea <sup>74</sup>       | - | ? | + | ? | + | + | + | ? | + |
| Park K., 2022, South Korea <sup>30</sup>     | - | + | + | ? | + | + | + | - | + |
| Peng X., 2022, China <sup>75</sup>           | + | + | + | ? | + | + | + | - | + |
| Petrosyan Y., 2022, Canada <sup>89</sup>     | - | + | + | ? | + | + | + | - | + |
| Racine A. M., 2020, USA <sup>80</sup>        | + | + | + | - | + | + | + | - | + |
| Ren W., 2022, China <sup>95</sup>            | ? | ? | ? | ? | + | ? | + | ? | ? |
| Schenk J., 2021, Netherlands <sup>103</sup>  | + | ? | + | + | + | ? | + | - | ? |

|                                                   |   |   |   |   |   |   |   |   |   |
|---------------------------------------------------|---|---|---|---|---|---|---|---|---|
| Shi S., 2021, China <sup>90</sup>                 | - | + | + | ? | + | + | + | - | + |
| Shin S., 2021, South Korea <sup>120</sup>         | - | + | ? | ? | + | - | + | ? | - |
| Sobrie O., 2016, Belgium <sup>49</sup>            | - | + | + | - | + | + | + | - | + |
| Solomon S. C., 2020, USA <sup>107</sup>           | - | + | ? | ? | + | + | + | ? | + |
| Song B. M., 2021, USA <sup>127</sup>              | ? | + | ? | - | + | + | + | ? | + |
| Song Y., 2023, China <sup>82</sup>                | - | + | ? | - | + | + | + | ? | + |
| Sridhar S., 2022, USA <sup>129</sup>              | - | + | - | ? | + | + | + | - | + |
| Suhre W., 2020, USA <sup>31</sup>                 | + | ? | ? | - | + | + | + | ? | + |
| Tan J., 2020, China <sup>97</sup>                 | ? | + | ? | ? | + | ? | + | ? | ? |
| Tavolara T. E., 2021, USA <sup>34</sup>           | + | ? | + | - | + | ? | + | - | ? |
| Tourani R., 2019, USA <sup>32</sup>               | + | + | + | - | + | + | + | + | + |
| Tschoellitsch T., 2022, Austria <sup>96</sup>     | - | + | + | ? | + | + | + | - | + |
| Van de Sande D., 2021, Netherlands <sup>131</sup> | ? | - | + | - | + | + | - | ? | - |
| Van de Sande D., 2022, Netherlands <sup>43</sup>  | ? | - | - | - | + | + | - | - | - |
| Walczak S., 2020, USA <sup>44</sup>               | + | + | ? | + | + | + | + | ? | + |
| Wijnberge M., 2020, Netherlands <sup>35</sup>     | + | + | ? | ? | + | ? | + | ? | ? |
